# Supplementary material for: SARS-CoV-2 Herd Immunity of the Kyrgyz Population in 2021
Source: Research Square preprint supplement (doi:10.21203/rs.3.rs-1138128/v1), 2021-12-09
Supplement: Supplementary file 1 [file 9695311d97f2dbf3c899baaf.docx]

Аdditional file to SARS-CoV-2 HERD IMMUNITY OF THE KYRGYZ POPULATION IN 2021

Anna Y. Popova1, Omor T. Kasymov2, Vyacheslav Y. Smolenski1, Vyacheslav S. Smirnov3, et al.

**Table 1S. Distribution of IgG Abs to SARS-CoV-2 Nc, by volunteer age group** (numerical values for Fig. 1).

| Age group, years | Number analyzed,n | IgG antibody range (BAU) | | | | | | | | | |
| --- | --- | --- | --- | --- | --- | --- | --- | --- | --- | --- | --- |
| 20.0–37.2 | | 37.4-150.0 | | 150.2-300.0 | | 300,2–600.0 | | >600 | |  |
| n | % (95% CI) | n | % (95 CI) | n | % (95% CI) | n | % (95% CI) | n | % (95% CI) |  |
| 1-17 | 793 | 71 | 9.0  (7.1-11.2) | 128 | 16.1  (13.7-18.9) | 39 | 4.9  (3.5-6.7) | 8 | 1.0  (0.4-2.0) | 13 | 1.6  (0.8-2.8) |  |
| 18-29 | 1447 | 161 | 11.1  (9.65-12.9) | 253 | 17.5  (15.6-19.5) | 72 | 5.0  (3.9-6.2) | 25 | 1.7  (1.1-2.5) | 28 | 1.9  (1.3-2.8) |  |
| 30-39 | 1658 | 214 | 12.9  (11.3-14.6) | 306 | 18.5  (16.6-20.4) | 77 | 4.6  (3.7-5.8) | 41 | 2.5  (1.8-3.3) | 44 | 2.7  (1.9-3.6) |  |
| 40-49 | 1681 | 253 | 15.1  (13.4-16.9) | 417 | 24.8  (22.8-26.9) | 93 | 5.5  (4.5-6.7) | 44 | 2.6  (1.9-3.5) | 45 | 2.7  (2.0-3.6) |  |
| 50-59 | 1739 | 242 | 13.9  (12.3-15.6) | 545 | 31.3  (25.5-33.6) | 121 | 7.0  (5.8-8.3) | 68 | 3.9  (3.1-4.9) | 52 | 3.0  (2.2-3.9) |  |
| 60-69 | 1437 | 200 | 13.9  (12.2-15.8) | 405 | 28.2  (25.9-30.6) | 144 | 10.0  (8.5-11.7) | 60 | 4.2  (3.2-5.3) | 41 | 2.9  (2.1-3.9) |  |
| 70+ | 716 | 87 | 12.2  (9.9-14.8) | 186 | 26.0  (22.8-29.4) | 58 | 8.1  (6.2-10.4) | 39 | 5.4  (3.9-7.4) | 29 | 4.1  (2.7-5.8) |  |
| TOTAL | 9471 | 1228 | 13.0  (12.3-13.7) | 2240 | 23.7  (22.8-24.5) | 604 | 6.4  (5.9-6.9) | 285 | 3.0  (2.7-3.4) | 252 | 2.7  (2.4-3.0) |  |

Note: n – number of volunteers.
